# Supplementary material for: Predicting Rifampicin Resistance Mutations in Bacterial RNA Polymerase Subunit Beta Based on Machine Learning Algorithms
Source: Research Square preprint supplement (doi:10.21203/rs.3.rs-127050/v1), 2020-12-17
Supplement: Supplementary file 1 [file f8fd734e480f93ebec1bd8c9.docx]

Supporting Information

TITLE: Predicting Rifampicin Resistance Mutations in Bacterial RNA Polymerase Subunit Beta Based on Machine learning algorithms

AUTHORS: Qing Ning, Dali Wang*, Fei Cheng, Yuheng Zhong, Qi Ding, Jing You

ADDRESS:Guangdong Key Laboratory of Environmental Pollution and Health, School of Environment, Jinan University, Guangzhou 511443, China

JOURNAL:

NO. OF PAGES: 7

FIGURES: 3

TABLES: 4

*Corresponding author.

Tel: 0086-20-3733-6629, Email: [wdali2018@jnu.edu.cn](mailto:wdali2018@jnu.edu.cn)


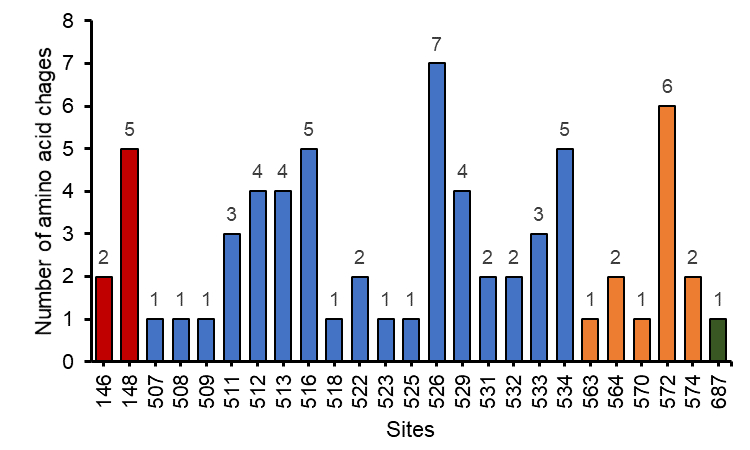


Figure S1. Positions and numbers of amino acid changes in positive mutations within RRDRs of RpoB, where red represents RRDR-N, blue means RRDR-I, orange denotes RRDR-II and green is RRDR-III.


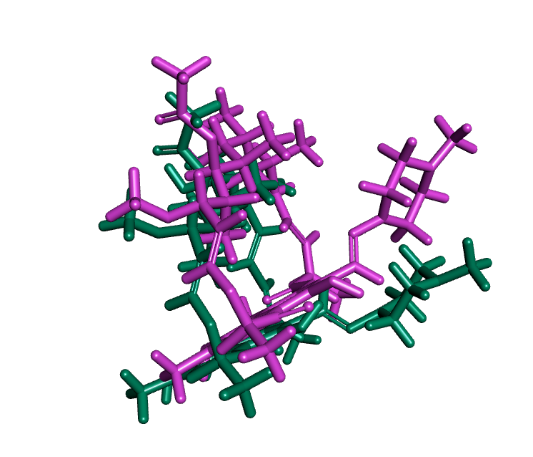


Figure S2. Comparisons of the docked poses between mutant D516V and wild type RpoB with Rif. The purple pose represents wild type RpoB and the green one is mutant D516V.


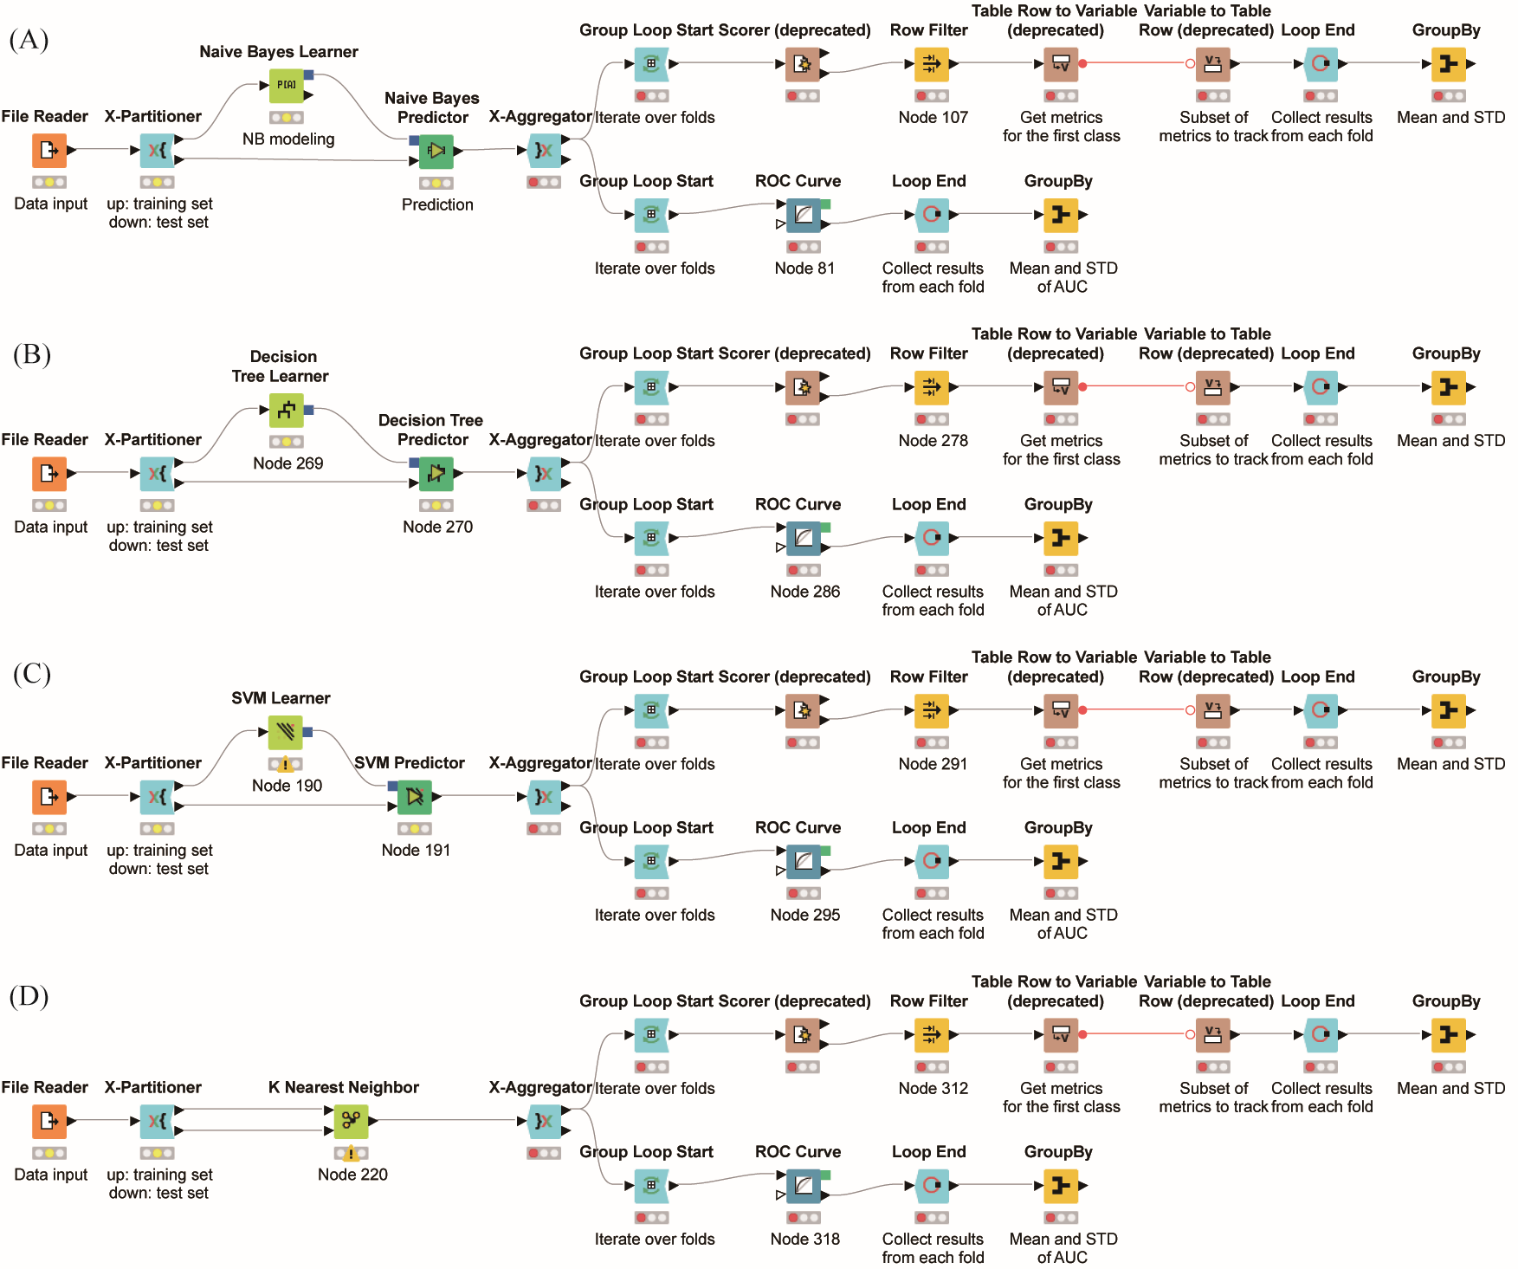


Figure S3. Workflow for the four predictive models. (A) naïve bayes (NB), (B) decision tree (DT), (C) support vector machine (SVM) and (D) k nearest neighbor (kNN).

Table S1. Parameters referring to the mutated proteins constructed through PremPS Server

| Features | Annotation |
| --- | --- |
| PremPS | Quantitative changes in unfolding Gibbs free energy (ΔΔG) |
| Location | There are two values for location, “COR” indicates that the mutated amino acid is buried in the protein core, while “SUR” means the mutated residue locates on the surface of the protein |
| PSSM | Position-Specific Scoring Matrix created by PSI-BLAST |
| ΔCS | Change of conservation after mutation calculated by PROVEAN method |
| ΔOMH | Difference of hydrophobicity scale between mutant and wild-type residue type |
| P_L | Fraction of leucine (L) buried in the protein core |
| P_FWY | Fraction of aromatic residues (F, W or Y) buried in the protein core |
| P_RKDE | Fraction of charged residues (R, K, D or E) buried in the protein core |
| N_Hydro | Number of hydrophobic (V, I, L, F, M, W, Y or C) of 23 sites in the protein sequence, the center of which is at the mutated site |
| N_Charg | Number of charged amino acids (R, K, D or E) of 23 sites in the protein sequence, the center of which is at the mutated site |
| SASA_pro | Solvent accessible surface area (SASA) of the mutated residue in the protein |
| SASA_sol | Solvent accessible surface area (SASA) of the mutated residue in the extended tripeptide |

Table S2. Confusion matrix of the four developed classifiers. DT: decision tree; kNN: k nearest neighbors; NB: naïve bayes; SVM: supporting vector machine; MC: majority consensus

| Type/Prediction | NB | | SVM | | kNN | | DT | | MC | |
| --- | --- | --- | --- | --- | --- | --- | --- | --- | --- | --- |
| negative | positive | negative | positive | negative | positive | negative | positive | negative | positive |
| negative | 33 | 20 | 25 | 28 | 39 | 14 | 36 | 17 | 44 | 9 |
| positive | 8 | 58 | 9 | 57 | 14 | 52 | 18 | 48 | 11 | 55 |

| Table S3. The results of the PremPS-obtained features and the docking energy for the RpoB mutants. N: negative, P: positive. | | | | | | | | | | | | | | | | | |
| --- | --- | --- | --- | --- | --- | --- | --- | --- | --- | --- | --- | --- | --- | --- | --- | --- | --- |
| Chain | Mutation | Sites | PremPS | Location | PSSM | DCS | DOMH | P_L | P_FWY | P_RKDE | N_Hydro | N_Charg | SASA_pro | SASA_sol | Docking | ΔE | Type |
| C | I145V | 145 | 0.53 | COR | -0.54 | 0.55 | 0.18 | 0.04 | -0.05 | -0.01 | 0.03 | -0.03 | 0.21 | 0.15 | -8.43 | 0.03 | N |
| C | V146F | 146 | 1.17 | COR | 0.61 | 0.76 | -0.68 | -0.04 | 0.10 | -0.16 | 0.13 | 0.01 | 0.38 | 0.06 | -7.49 | 0.97 | P |
| C | V146G | 146 | 3.31 | COR | 0.89 | 0.77 | 0.95 | -0.04 | 0.20 | -0.04 | 0.04 | -0.07 | 0.48 | 0.13 | -8.49 | -0.03 | P |
| C | S147T | 147 | 0.88 | COR | 0.52 | 0.55 | -0.19 | 0.05 | 0.08 | -0.18 | 0.15 | 0.03 | 0.17 | -0.29 | -8.54 | -0.08 | N |
| C | S147N | 147 | 0.84 | COR | -0.50 | 1.13 | 0.33 | 0.06 | 0.02 | -0.10 | 0.03 | 0.00 | 0.10 | -0.23 | -8.52 | -0.06 | N |
| C | Q148L | 148 | 0.82 | COR | 0.50 | 0.81 | -0.99 | -0.04 | 0.13 | -0.07 | 0.09 | 0.03 | 0.26 | 0.10 | -8.45 | 0.01 | P |
| C | Q148R | 148 | 1.54 | COR | 0.55 | 0.64 | -0.41 | -0.06 | 0.10 | -0.10 | 0.15 | 0.04 | 0.45 | 0.17 | -8.47 | -0.01 | P |
| C | Q148P | 148 | 1.51 | COR | 0.61 | 0.69 | -0.42 | -0.06 | 0.09 | -0.13 | 0.16 | 0.00 | 0.40 | 0.18 | -8.48 | -0.02 | P |
| C | Q148H | 148 | 1.61 | COR | 0.55 | 0.75 | -0.41 | -0.06 | 0.09 | -0.12 | 0.17 | 0.02 | 0.45 | 0.17 | -8.43 | 0.03 | P |
| C | Q148K | 148 | 1.79 | COR | 0.49 | 0.66 | -0.22 | -0.04 | 0.11 | -0.11 | 0.18 | 0.05 | 0.50 | 0.16 | -8.48 | -0.02 | P |
| C | L149M | 149 | 0.56 | COR | -0.70 | 0.92 | -0.03 | 0.04 | -0.02 | -0.05 | 0.03 | 0.03 | 0.15 | 0.19 | -8.54 | -0.08 | N |
| C | E504S | 504 | 0.36 | SUR | 0.59 | 0.68 | -0.34 | -0.04 | 0.05 | 0.05 | -0.02 | -0.08 | -0.62 | 0.09 | -8.49 | -0.03 | N |
| C | E504T | 504 | 0.27 | SUR | 0.56 | 0.67 | -0.41 | -0.04 | 0.05 | 0.03 | -0.01 | -0.08 | -0.58 | 0.08 | -8.56 | -0.1 | N |
| C | F506Y | 506 | 1.34 | COR | -0.02 | 0.91 | 0.03 | -0.01 | 0.03 | -0.10 | -0.08 | 0.00 | 0.36 | 0.21 | -8.47 | -0.01 | N |
| C | G507T | 507 | 0.93 | SUR | 0.00 | 1.38 | -0.13 | 0.03 | -0.01 | -0.16 | -0.06 | 0.01 | 0.08 | -0.20 | -8.46 | 0 | N |
| C | G507S | 507 | 0.99 | SUR | 0.38 | 1.05 | -0.07 | 0.00 | 0.03 | -0.21 | -0.08 | -0.03 | 0.12 | -0.21 | -8.46 | 0 | N |
| C | G507A | 507 | 0.92 | SUR | 0.53 | 0.88 | -0.17 | 0.03 | 0.04 | -0.21 | -0.10 | -0.02 | 0.12 | -0.17 | -8.42 | 0.04 | N |
| C | G507D | 507 | 1.1 | SUR | 0.58 | 0.88 | 0.20 | -0.01 | 0.05 | -0.22 | -0.07 | -0.04 | 0.05 | -0.32 | -8.4 | 0.06 | P |
| C | S508T | 508 | 0.17 | SUR | -0.44 | 1.04 | -0.07 | -0.02 | 0.01 | -0.04 | 0.00 | 0.02 | -0.09 | -0.23 | -8.46 | 0 | N |
| C | S508A | 508 | 0.42 | SUR | 0.28 | 0.73 | -0.05 | -0.02 | 0.03 | -0.07 | -0.02 | -0.08 | -0.16 | -0.23 | -8.49 | -0.03 | N |
| C | S508P | 508 | 0.73 | SUR | 0.59 | 0.80 | -0.01 | 0.02 | 0.04 | -0.09 | -0.04 | -0.15 | -0.18 | -0.24 | -8.47 | -0.01 | P |
| C | S509N | 509 | 0.7 | SUR | 0.51 | 0.72 | 0.10 | 0.02 | 0.04 | -0.19 | -0.05 | -0.16 | -0.01 | -0.28 | -8.48 | -0.02 | N |
| C | S509G | 509 | 0.44 | SUR | -0.38 | 1.27 | 0.04 | 0.08 | -0.07 | -0.14 | -0.03 | -0.04 | -0.03 | -0.25 | -8.46 | 0 | N |
| C | S509R | 509 | 0.72 | SUR | 0.60 | 0.80 | -0.01 | 0.01 | 0.04 | -0.19 | -0.09 | -0.19 | 0.03 | -0.27 | -8.42 | 0.04 | P |
| C | Q510A | 510 | 0.27 | SUR | 0.51 | 0.68 | -0.30 | -0.01 | 0.04 | 0.05 | -0.02 | -0.11 | -0.64 | 0.07 | -8.34 | 0.12 | N |
| C | Q510R | 510 | 0.25 | SUR | 0.51 | 0.67 | -0.30 | -0.01 | 0.04 | 0.04 | -0.02 | -0.11 | -0.65 | 0.08 | -7.79 | 0.67 | N |
| C | L511P | 511 | 3.08 | COR | 0.72 | 0.85 | 0.96 | -0.05 | 0.20 | -0.10 | 0.01 | -0.07 | 0.45 | 0.13 | -8.46 | 0 | P |
| C | L511Q | 511 | 2.98 | COR | 0.72 | 0.75 | 0.95 | -0.05 | 0.22 | -0.10 | 0.00 | -0.08 | 0.46 | 0.13 | -8.24 | 0.22 | P |
| C | L511R | 511 | 2.96 | COR | 0.72 | 0.75 | 0.95 | -0.05 | 0.21 | -0.11 | 0.00 | -0.09 | 0.45 | 0.13 | -8.64 | -0.18 | P |
| C | S512F | 512 | 0.75 | COR | 0.60 | 0.96 | -0.77 | 0.03 | 0.14 | -0.15 | -0.06 | 0.05 | 0.15 | -0.20 | -8.52 | -0.06 | P |
| C | S512P | 512 | 1.14 | COR | 0.65 | 0.77 | -0.08 | 0.00 | 0.09 | -0.22 | -0.09 | -0.01 | 0.30 | -0.26 | -8.34 | 0.12 | P |
| C | S512A | 512 | 1.06 | COR | 0.51 | 0.73 | -0.10 | 0.02 | 0.08 | -0.18 | -0.08 | 0.03 | 0.33 | -0.29 | -8.49 | -0.03 | P |
| C | S512Y | 512 | 0.82 | COR | 0.64 | 0.95 | -0.73 | 0.03 | 0.12 | -0.15 | -0.06 | 0.05 | 0.18 | -0.20 | -8.46 | 0 | P |
| C | Q513L | 513 | 0.6 | SUR | 0.53 | 0.77 | -0.71 | 0.01 | 0.07 | -0.03 | -0.01 | 0.01 | -0.07 | 0.03 | -7.71 | 0.75 | P |
| C | Q513P | 513 | 0.83 | SUR | 0.59 | 0.69 | -0.29 | 0.00 | 0.01 | -0.08 | 0.00 | -0.02 | -0.12 | 0.06 | -8.09 | 0.37 | P |
| C | Q513R | 513 | 0.79 | SUR | 0.51 | 0.67 | -0.30 | 0.03 | 0.01 | -0.07 | 0.00 | 0.02 | -0.14 | 0.06 | -6.37 | 2.09 | P |
| C | Q513K | 513 | 0.94 | SUR | 0.53 | 0.67 | -0.14 | 0.04 | 0.02 | -0.09 | 0.00 | 0.02 | -0.17 | 0.07 | -6.88 | 1.58 | P |
| C | M515L | 515 | 1.52 | COR | 0.50 | 0.60 | -0.26 | -0.06 | 0.11 | -0.09 | -0.09 | 0.02 | 0.55 | 0.24 | -8.55 | -0.09 | N |
| C | D516N | 516 | 0.51 | SUR | 0.45 | 0.68 | -0.23 | 0.01 | 0.05 | -0.14 | -0.10 | 0.01 | 0.02 | -0.24 | -8.34 | 0.12 | P |
| C | D516V | 516 | 0.44 | SUR | 0.34 | 0.83 | -0.63 | 0.02 | 0.18 | -0.09 | -0.04 | 0.00 | 0.01 | -0.20 | -8.3 | 0.16 | P |
| C | D516Y | 516 | 0.41 | SUR | 0.35 | 0.80 | -0.62 | 0.01 | 0.18 | -0.10 | -0.04 | 0.01 | 0.01 | -0.20 | -6.44 | 2.02 | P |
| C | D516G | 516 | 0.41 | SUR | 0.48 | 0.72 | -0.36 | 0.00 | 0.09 | -0.16 | -0.09 | -0.05 | 0.02 | -0.24 | -8.7 | -0.24 | P |
| C | D516A | 516 | 0.08 | SUR | 0.33 | 0.71 | -0.52 | -0.02 | 0.11 | -0.21 | -0.07 | -0.04 | 0.05 | -0.24 | -8.72 | -0.26 | P |
| C | N518T | 518 | 0.2 | COR | -0.72 | 1.10 | -0.35 | 0.03 | -0.01 | -0.16 | 0.01 | 0.05 | 0.18 | 0.08 | -8.53 | -0.07 | N |
| C | N518I | 518 | 0.9 | COR | 0.65 | 0.83 | -0.99 | -0.02 | 0.12 | -0.13 | 0.11 | 0.01 | 0.24 | 0.07 | -8.44 | 0.02 | N |
| C | N518L | 518 | 0.81 | COR | 0.55 | 0.86 | -0.99 | -0.02 | 0.12 | -0.12 | 0.10 | 0.00 | 0.23 | 0.07 | -8.54 | -0.08 | N |
| C | N518D | 518 | 1.46 | COR | 0.53 | 0.65 | -0.01 | -0.02 | 0.10 | -0.19 | 0.01 | 0.02 | 0.29 | 0.07 | -8.52 | -0.06 | P |
| C | S522A | 522 | 0.86 | COR | 0.28 | 0.59 | -0.13 | 0.05 | 0.09 | -0.13 | -0.08 | 0.06 | 0.44 | -0.31 | -8.42 | 0.04 | N |
| C | S522G | 522 | 1.68 | COR | 0.62 | 0.86 | -0.06 | 0.07 | 0.12 | -0.14 | -0.14 | 0.10 | 0.54 | -0.29 | -8.34 | 0.12 | N |
| C | S522F | 522 | 1.13 | COR | 0.68 | 0.93 | -0.80 | 0.07 | 0.11 | -0.07 | -0.10 | 0.11 | 0.41 | -0.22 | -8.36 | 0.1 | P |
| C | S522Y | 522 | 1.18 | COR | 0.71 | 0.92 | -0.77 | 0.07 | 0.11 | -0.07 | -0.12 | 0.12 | 0.44 | -0.22 | -8.45 | 0.01 | P |
| C | E523G | 523 | 1.1 | COR | 0.62 | 0.77 | -0.38 | -0.02 | 0.08 | -0.22 | -0.05 | 0.00 | 0.14 | 0.18 | -8.46 | 0 | N |
| C | E523S | 523 | 0.86 | COR | 0.62 | 0.75 | -0.55 | -0.02 | 0.10 | -0.25 | -0.05 | 0.01 | 0.09 | 0.16 | -8.49 | -0.03 | N |
| C | E523V | 523 | 0.56 | COR | 0.49 | 0.86 | -0.95 | -0.03 | 0.14 | -0.12 | -0.05 | 0.00 | 0.10 | 0.13 | -8.5 | -0.04 | P |
| C | I524L | 524 | 1.32 | COR | 0.59 | 0.25 | -0.18 | 0.03 | 0.11 | -0.11 | -0.07 | 0.06 | 0.54 | 0.10 | -8.37 | 0.09 | N |
| C | I524M | 524 | 1.47 | COR | 0.54 | 0.42 | -0.18 | 0.01 | 0.11 | -0.12 | -0.07 | 0.04 | 0.62 | 0.11 | -8.48 | -0.02 | N |
| C | I524V | 524 | 0.07 | COR | -0.49 | 0.27 | 0.26 | -0.06 | -0.08 | 0.00 | -0.04 | 0.00 | 0.04 | 0.17 | -8.46 | 0 | N |
| C | T525N | 525 | 2 | COR | 0.60 | 0.72 | 0.18 | 0.01 | 0.12 | -0.14 | -0.02 | 0.07 | 0.59 | -0.15 | -8.5 | -0.04 | N |
| C | T525R | 525 | 1.77 | COR | 0.62 | 0.74 | -0.01 | 0.02 | 0.09 | -0.16 | -0.05 | 0.07 | 0.61 | -0.17 | -8.55 | -0.09 | P |
| C | H526Y | 526 | 0.98 | COR | 0.54 | 0.80 | -0.98 | 0.02 | 0.15 | -0.12 | 0.09 | 0.01 | 0.33 | 0.15 | -7.2 | 1.26 | P |
| C | H526P | 526 | 1.46 | COR | 0.58 | 0.77 | -0.30 | -0.05 | 0.08 | -0.17 | 0.01 | 0.02 | 0.29 | 0.23 | -8.82 | -0.36 | P |
| C | H526R | 526 | 1.57 | COR | 0.61 | 0.76 | -0.25 | -0.06 | 0.10 | -0.17 | 0.02 | 0.02 | 0.31 | 0.23 | -9.52 | -1.06 | P |
| C | H526L | 526 | 0.87 | COR | 0.39 | 0.87 | -0.90 | -0.02 | 0.13 | -0.07 | 0.08 | -0.02 | 0.28 | 0.12 | -8.54 | -0.08 | P |
| C | H526D | 526 | 2.01 | COR | 0.63 | 0.83 | 0.16 | -0.05 | 0.10 | -0.23 | -0.01 | 0.03 | 0.34 | 0.20 | -8.33 | 0.13 | P |
| C | R529S | 529 | 1.61 | COR | 0.56 | 0.73 | -0.09 | 0.01 | 0.00 | -0.08 | 0.06 | -0.01 | 0.02 | 0.40 | -8.89 | -0.43 | P |
| C | R529C | 529 | 0.8 | COR | 0.36 | 0.65 | -0.61 | -0.02 | 0.09 | -0.06 | 0.05 | 0.00 | 0.04 | 0.30 | -9.1 | -0.64 | P |
| C | R529H | 529 | 1.91 | COR | 0.60 | 0.77 | 0.01 | 0.02 | 0.03 | -0.08 | 0.09 | 0.01 | 0.03 | 0.43 | -9.02 | -0.56 | P |
| C | R529L | 529 | 1.03 | COR | 0.47 | 0.80 | -0.81 | 0.01 | 0.12 | -0.01 | 0.06 | 0.02 | 0.04 | 0.34 | -8.28 | 0.18 | P |
| C | I530V | 530 | 0 | COR | -0.40 | 0.11 | 0.31 | -0.04 | -0.10 | 0.09 | -0.11 | 0.04 | -0.08 | 0.18 | -8.52 | -0.06 | N |
| C | I530L | 530 | 0.62 | COR | -0.54 | 0.94 | -0.05 | 0.05 | -0.01 | -0.07 | -0.03 | 0.05 | 0.13 | 0.15 | -8.48 | -0.02 | N |
| C | I530M | 530 | 1.08 | COR | 0.27 | 0.50 | -0.08 | 0.00 | 0.07 | -0.14 | 0.01 | 0.00 | 0.36 | 0.10 | -8.47 | -0.01 | N |
| C | S531N | 531 | 1.15 | COR | 0.58 | 0.68 | 0.15 | 0.10 | 0.08 | -0.23 | 0.06 | 0.04 | -0.01 | -0.29 | -7.25 | 1.21 | N |
| C | S531F | 531 | 0.52 | COR | 0.57 | 0.97 | -0.80 | 0.06 | 0.11 | -0.19 | 0.09 | -0.04 | -0.02 | -0.24 | -7.43 | 1.03 | P |
| C | S531L | 531 | 0.6 | COR | 0.57 | 0.97 | -0.71 | 0.06 | 0.10 | -0.18 | 0.09 | -0.04 | -0.02 | -0.24 | -7.01 | 1.45 | P |
| C | S531Y | 531 | 0.53 | COR | 0.61 | 0.97 | -0.80 | 0.06 | 0.10 | -0.18 | 0.10 | -0.04 | -0.03 | -0.24 | -7.2 | 1.26 | P |
| C | A532V | 532 | 1.33 | COR | 0.65 | 0.99 | -0.45 | 0.11 | 0.11 | -0.16 | 0.14 | -0.08 | 0.12 | -0.10 | -8.61 | -0.15 | P |
| C | A532E | 532 | 1.46 | COR | 0.60 | 0.82 | 0.18 | 0.04 | 0.09 | -0.25 | 0.03 | 0.01 | 0.19 | -0.26 | -8.37 | 0.09 | P |
| C | L533P | 533 | 2.84 | COR | 0.76 | 0.85 | 0.98 | -0.02 | 0.20 | -0.02 | 0.01 | 0.04 | -0.11 | 0.13 | -7.39 | 1.07 | P |
| C | L533H | 533 | 2.88 | COR | 0.76 | 0.85 | 1.01 | -0.02 | 0.20 | -0.02 | 0.02 | 0.04 | -0.11 | 0.13 | -7.39 | 1.07 | P |
| C | L533R | 533 | 2.79 | COR | 0.77 | 0.77 | 1.00 | -0.02 | 0.20 | -0.03 | 0.01 | 0.04 | -0.10 | 0.13 | -6.19 | 2.27 | P |
| C | G534D | 534 | 1.45 | COR | 0.63 | 0.95 | 0.19 | 0.00 | 0.07 | -0.23 | 0.02 | 0.01 | 0.16 | -0.35 | -7.29 | 1.17 | P |
| C | G534V | 534 | 1.32 | COR | 0.61 | 1.07 | -0.43 | 0.09 | 0.11 | -0.14 | 0.04 | -0.04 | 0.05 | -0.03 | -8.35 | 0.11 | P |
| C | G534S | 534 | 1.25 | COR | 0.61 | 0.90 | -0.11 | 0.04 | 0.07 | -0.19 | 0.07 | 0.00 | 0.15 | -0.27 | -8.28 | 0.18 | P |
| C | G534C | 534 | 1.01 | COR | 0.58 | 0.98 | -0.48 | 0.05 | 0.09 | -0.22 | 0.06 | -0.04 | 0.09 | -0.10 | -8 | 0.46 | P |
| C | G534A | 534 | 1.11 | COR | 0.59 | 0.89 | -0.22 | 0.06 | 0.05 | -0.20 | 0.09 | -0.04 | 0.14 | -0.26 | -8.55 | -0.09 | P |
| C | P535I | 535 | 0.69 | SUR | 0.50 | 0.83 | -0.59 | 0.04 | 0.09 | -0.08 | 0.04 | -0.02 | -0.06 | -0.06 | -8.46 | 0 | N |
| C | P535Q | 535 | 1.18 | SUR | 0.42 | 0.89 | 0.11 | 0.04 | 0.07 | -0.11 | 0.05 | 0.00 | -0.23 | -0.06 | -8.46 | 0 | N |
| C | P535E | 535 | 0.81 | SUR | -0.42 | 1.16 | 0.27 | 0.03 | 0.04 | -0.09 | 0.02 | -0.02 | -0.12 | -0.06 | -8.55 | -0.09 | N |
| C | T563S | 563 | 0.75 | COR | 0.46 | 0.70 | -0.05 | -0.04 | 0.03 | -0.21 | -0.09 | -0.07 | 0.15 | -0.14 | -7.91 | 0.55 | N |
| C | T563P | 563 | 0.74 | COR | 0.55 | 0.70 | -0.06 | -0.08 | 0.04 | -0.25 | -0.09 | -0.08 | 0.17 | -0.15 | -7.86 | 0.6 | P |
| C | P564L | 564 | 0.66 | COR | 0.42 | 0.94 | -0.67 | 0.01 | 0.10 | -0.18 | -0.01 | 0.01 | 0.05 | -0.02 | -7.27 | 1.19 | P |
| C | P564R | 564 | 1.06 | COR | 0.52 | 0.88 | -0.02 | -0.05 | 0.04 | -0.23 | -0.02 | -0.08 | 0.09 | -0.07 | -8.9 | -0.44 | P |
| C | P567G | 567 | 1.08 | SUR | 0.59 | 0.79 | -0.01 | 0.00 | 0.05 | -0.05 | 0.09 | -0.08 | -0.26 | -0.03 | -8.35 | 0.11 | N |
| C | P567Q | 567 | 0.54 | SUR | -0.53 | 1.13 | 0.20 | -0.01 | 0.01 | -0.04 | 0.03 | -0.02 | -0.21 | -0.03 | -8.47 | -0.01 | N |
| C | N568S | 568 | 1.11 | SUR | 0.54 | 0.75 | -0.32 | -0.05 | 0.05 | -0.12 | 0.10 | 0.00 | 0.08 | 0.08 | -7.59 | 0.87 | N |
| C | I569A | 569 | 1.55 | SUR | 0.59 | 0.67 | 0.83 | 0.02 | 0.15 | -0.06 | -0.01 | -0.23 | -0.54 | 0.14 | -7.85 | 0.61 | N |
| C | G570C | 570 | 0.78 | COR | 0.51 | 0.99 | -0.48 | 0.02 | 0.12 | -0.20 | -0.04 | -0.16 | 0.10 | -0.07 | -8.47 | -0.01 | P |
| C | I572F | 572 | 0.93 | COR | 0.61 | 0.73 | -0.47 | -0.03 | 0.06 | -0.23 | -0.10 | -0.02 | 0.22 | 0.16 | -7.29 | 1.17 | P |
| C | I572L | 572 | 0.93 | COR | 0.50 | 0.33 | -0.09 | 0.00 | 0.08 | -0.15 | -0.05 | 0.04 | 0.19 | 0.07 | -8.9 | -0.44 | P |
| C | I572S | 572 | 2.33 | COR | 0.74 | 0.72 | 0.99 | -0.01 | 0.18 | -0.07 | -0.03 | -0.19 | -0.12 | 0.12 | -8.01 | 0.45 | P |
| C | I572M | 572 | 1 | COR | 0.44 | 0.61 | -0.12 | -0.01 | 0.04 | -0.16 | -0.07 | 0.01 | 0.17 | 0.08 | -8.46 | 0 | P |
| C | I572N | 572 | 2.55 | COR | 0.92 | 0.75 | 0.93 | -0.02 | 0.20 | -0.02 | -0.03 | -0.16 | -0.14 | 0.12 | -8.94 | -0.48 | P |
| C | I572T | 572 | 1.96 | COR | 0.48 | 0.67 | 0.86 | -0.05 | 0.18 | -0.10 | 0.00 | -0.18 | -0.07 | 0.15 | -8.26 | 0.2 | P |
| C | N573S | 573 | 0.81 | COR | 0.29 | 0.79 | -0.27 | -0.04 | 0.02 | -0.20 | -0.11 | -0.03 | 0.28 | 0.08 | -8.42 | 0.04 | N |
| C | N573G | 573 | 1.04 | COR | 0.61 | 0.73 | -0.25 | -0.04 | 0.05 | -0.24 | -0.11 | -0.03 | 0.27 | 0.05 | -8.49 | -0.03 | N |
| C | N573T | 573 | 0.86 | COR | 0.61 | 0.70 | -0.49 | -0.02 | 0.07 | -0.23 | -0.11 | -0.03 | 0.25 | 0.08 | -8.46 | 0 | N |
| C | N573L | 573 | 0.51 | COR | 0.48 | 0.84 | -0.94 | -0.01 | 0.12 | -0.16 | -0.07 | 0.03 | 0.17 | 0.05 | -8.5 | -0.04 | N |
| C | S574N | 574 | 1.16 | COR | 0.57 | 0.69 | 0.14 | 0.00 | 0.08 | -0.16 | -0.06 | -0.22 | 0.40 | -0.29 | -8.38 | 0.08 | N |
| C | S574T | 574 | 0.49 | COR | -0.38 | 1.14 | -0.11 | 0.09 | -0.04 | -0.07 | 0.00 | 0.02 | 0.12 | -0.28 | -8.4 | 0.06 | N |
| C | S574F | 574 | 0.71 | COR | 0.58 | 0.95 | -0.76 | 0.03 | 0.14 | -0.12 | -0.06 | -0.03 | 0.18 | -0.19 | -7.24 | 1.22 | P |
| C | S574Y | 574 | 0.77 | COR | 0.62 | 0.94 | -0.73 | 0.03 | 0.12 | -0.12 | -0.07 | -0.05 | 0.22 | -0.19 | -8.95 | -0.49 | P |
| C | L575M | 575 | 1.1 | COR | 0.00 | 0.60 | -0.05 | 0.01 | 0.01 | -0.08 | 0.02 | 0.09 | 0.27 | 0.23 | -8.44 | 0.02 | N |
| C | A683S | 683 | -0.61 | COR | -0.46 | -0.18 | 0.36 | 0.02 | 0.00 | 0.02 | -0.04 | -0.01 | -0.15 | -0.16 | -8.46 | 0 | N |
| C | A683T | 683 | 0.81 | COR | 0.57 | 0.13 | -0.13 | 0.06 | 0.09 | -0.15 | 0.06 | 0.00 | 0.42 | -0.25 | -8.43 | 0.03 | N |
| C | M685H | 685 | 3.3 | COR | 0.73 | 0.87 | 0.96 | -0.05 | 0.22 | -0.04 | 0.00 | 0.02 | 0.42 | 0.17 | -8.42 | 0.04 | N |
| C | Q686M | 686 | 0.36 | COR | -0.30 | 1.23 | -0.89 | 0.05 | 0.08 | -0.07 | 0.02 | -0.02 | 0.13 | 0.14 | -8.54 | -0.08 | N |
| C | Q686S | 686 | 1.29 | COR | 0.56 | 0.71 | -0.37 | -0.06 | 0.09 | -0.19 | 0.07 | -0.02 | 0.31 | 0.19 | -8.51 | -0.05 | N |
| C | R687H | 687 | 1.86 | COR | 0.60 | 0.77 | 0.00 | 0.03 | 0.02 | -0.08 | 0.08 | 0.01 | 0.00 | 0.44 | -8.29 | 0.17 | P |
| C | A689S | 689 | 1.52 | COR | 0.53 | 0.63 | -0.02 | 0.10 | 0.11 | -0.13 | -0.12 | 0.07 | 0.54 | -0.20 | -8.5 | -0.04 | N |

Table S4. Sequence range of rifampicin resistance-determining regions in *E. coli* K12 RpoB

| Rifampicin resistance-determining regions（RRDR） | Sequence range |
| --- | --- |
| RRDR-N | 143-148 |
| RRDR-Ⅰ | 504-538 |
| RRDR-Ⅱ | 562-575 |
| RRDR-Ⅲ | 684-691 |
